# Supplementary material for: Supramolecular Control of the Photoisomerization of a Coumarin-Based Photoswitch
Source: PubMed Central journal article supplement (PMC11696389; doi:10.1021/acsomega.4c08106), 2024-12-17
Supplement: ao4c08106_si_001.pdf [file ao4c08106_si_001.pdf]

# Supporting Information

## Supramolecular control of the photoisomerization of a coumarin based photoswitch

*Etelka Kiss*<sup>a</sup>, *Dávid Mester*<sup>a,b,c</sup>, *Márton Bojtár*<sup>d</sup>, *Zsombor Miskolczy*<sup>e</sup>, *László Biczók*<sup>e</sup>, *Dóra Hessz*<sup>a</sup>,  
*Mihály Kállay*<sup>a,b,c</sup> and *Miklós Kubinyi*<sup>a,\*</sup>

<sup>a</sup> Department of Physical Chemistry and Materials Science, Faculty of Chemical Technology and Biotechnology, Budapest University of Technology and Economics, 1111, Budapest, Műegyetem rkp. 3, Hungary

<sup>b</sup> MTA-BME Lendület Quantum Chemistry Research Group, Budapest University of Technology and Economics, 1111, Budapest, Műegyetem rkp. 3, Hungary;

<sup>c</sup> ELKH-BME Quantum Chemistry Research Group, Budapest University of Technology and Economics, 1111, Budapest, Műegyetem rkp. 3, Hungary;

<sup>d</sup> Chemical Biology Research Group, Institute of Organic Chemistry, Research Centre for Natural Sciences, 1117, Budapest, Magyar Tudósok krt. 2, Hungary

<sup>e</sup> Institute of Materials and Environmental Chemistry, Research Centre for Natural Sciences, HUN-REN Research Network, H-1519 Budapest, P.O. Box 286, Hungary

### Table of contents

|                                                                                           |    |
|-------------------------------------------------------------------------------------------|----|
| S1. NMR spectra .....                                                                     | 2  |
| S2. Photokinetic experiments .....                                                        | 3  |
| S3. Chemical shifts of the isomeric forms of CP in their WP <sub>n</sub> complexes .....  | 4  |
| S4. NMR spectra of the PSS mixtures.....                                                  | 5  |
| S5. Determination of the stoichiometry of <i>trans</i> -CP-WP <sub>n</sub> complexes..... | 6  |
| S6. Theoretical calculations.....                                                         | 10 |

---

\* Corresponding author.

E-mail address: [kubinyi.miklos@vbk.bme.hu](mailto:kubinyi.miklos@vbk.bme.hu) (M. Kubinyi).

### S1. NMR spectra

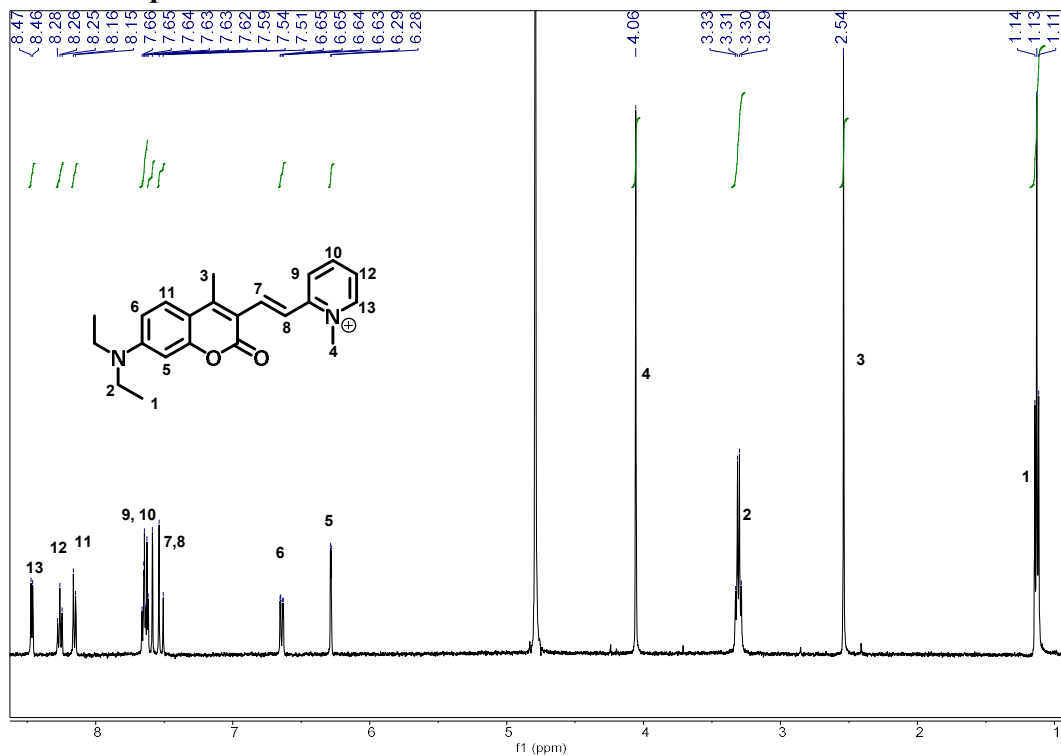

Fig. S1: <sup>1</sup>H-NMR spectrum of *trans*-CP at 500 MHz, D<sub>2</sub>O.

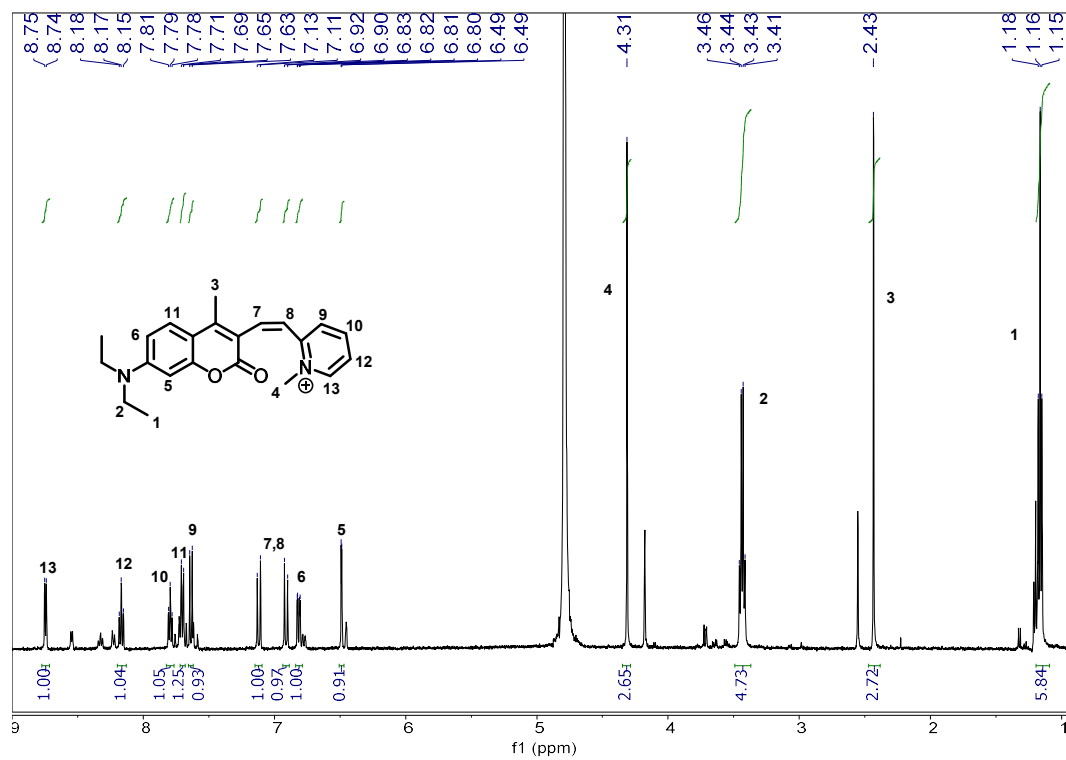

Fig. S2: <sup>1</sup>H-NMR spectrum of a PSS containing 75% *cis*-CP at 500 MHz in D<sub>2</sub>O

## S2. Photokinetic experiments

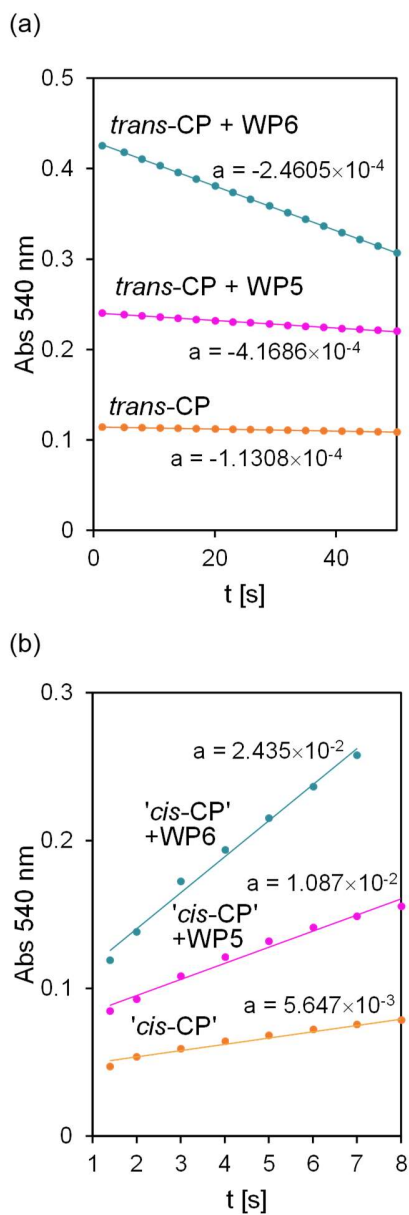

Fig. S3: Initial  $A^D(t)$  data of (a) of *trans*-CP, and its mixture with WP5 and WP6, irradiated with the green (540 nm) LED; (b) a PSS system with 75% *cis*-CP and its mixtures with WP5 and WP6, irradiated with the UV (370 nm) LED. “a” is the slope of linearly fitted data ( $s^{-1}$ ). Concentrations as given in the captions of Figs. 5 and 6.

### S3. Chemical shifts of the isomeric forms of CP in their WPn complexes

Table S1: Chemical shifts of *trans*-CP, *cis*-CP and their WP5 complexes

| Proton | WP5            | <i>trans</i> -CP |                     | ' <i>cis</i> -CP' |                     |
|--------|----------------|------------------|---------------------|-------------------|---------------------|
|        | <i>free</i>    | <i>free</i>      | <i>1 equiv. WP5</i> | <i>free</i>       | <i>1 equiv. WP5</i> |
|        | $\delta$ [ppm] | $\delta$ [ppm]   |                     | $\delta$ [ppm]    |                     |
| A      | 4.27           |                  | 4.16                |                   | 4.19                |
| B      | 3.84           |                  | 3.78                |                   | 3.81                |
| C      | 6.73           |                  | 6.64                |                   | 6.67                |
| 1      |                | 1.20             | 1.09                | 1.16              | 0.97                |
| 2      |                | 3.55             | 3.23                | 3.43              | 3.21                |
| 3      |                | 2.55             | 2.39                | 2.43              | 2.36                |
| 4      |                | 4.18             | 3.95                | 4.31              | 4.25                |
| 5      |                | 6.28             | 6.15                | 6.49              | 6.35                |
| 6      |                | 6.64             | 6.51                | 6.82              | 6.73                |
| 7      |                | 7.52             | 7.38                | 6.91              | 6.83                |
| 8      |                | 7.60             | 7.53 – 7.43         | 7.12              | 7.03                |
| 9      |                | 7.68 – 7.62      | 7.53 – 7.43         | 7.70              | 7.64                |
| 10     |                | 7.68 – 7.62      | 7.53 – 7.43         | 7.79              | 7.70                |
| 11     |                | 8.16             | 8.05                | 7.64              | 7.56 – 7.46         |
| 12     |                | 8.27             | 8.10                | 8.17              | 8.04                |
| 13     |                | 8.47             | 8.31                | 8.75              | 8.66                |

Table S2: Chemical shifts of *trans*-CP, *cis*-CP and their WP6 complexes

| Proton | WP6            | <i>trans</i> -CP |                     | <i>cis</i> -CP |                     |
|--------|----------------|------------------|---------------------|----------------|---------------------|
|        | <i>free</i>    | <i>free</i>      | <i>1 equiv. WP6</i> | <i>free</i>    | <i>1 equiv. WP6</i> |
|        | $\delta$ [ppm] | $\delta$ [ppm]   |                     | $\delta$ [ppm] |                     |
| A      | 4.07           |                  | 4.23                |                | 4.27                |
| B      | 3.86           |                  | 3.86                |                | 3.87                |
| C      | 6.64           |                  | 6.79                |                | 6.82                |
| 1      |                | 1.20             | 0.16                | 1.16           | – 0.15              |
| 2      |                | 3.55             | 2.16                | 3.43           | 1.88                |
| 3      |                | 2.55             | 2.49                | 2.43           | 2.24                |
| 4      |                | 4.18             | 4.05                | 4.31           | 4.25 – 4.09         |
| 5      |                | 6.28             | 5.58                | 6.49           | 5.61                |
| 6      |                | 6.64             | ?                   | 6.82           | ?                   |
| 7/8    |                | 7.52             | 7.09                | 6.91           | ?                   |
| 7/8    |                | 7.67 – 7.61      | 7.62 – 7.42         | 7.12           | 7.13                |
| 9      |                | 7.67 – 7.61      | 7.79 – 7.42         | 7.70           | 7.78 – 7.50         |
| 10     |                | 7.67 – 7.61      | 7.79 – 7.42         | 7.79           | 7.78 – 7.50         |
| 11     |                | 8.16             | 8.16 – 8.02         | 7.64           | 7.78 – 7.50         |
| 12     |                | 8.27             | 8.16 – 8.02         | 8.17           | 8.08                |
| 13     |                | 8.47             | 8.33                | 8.75           | 8.70                |

### S4. NMR spectra of the PSS mixtures

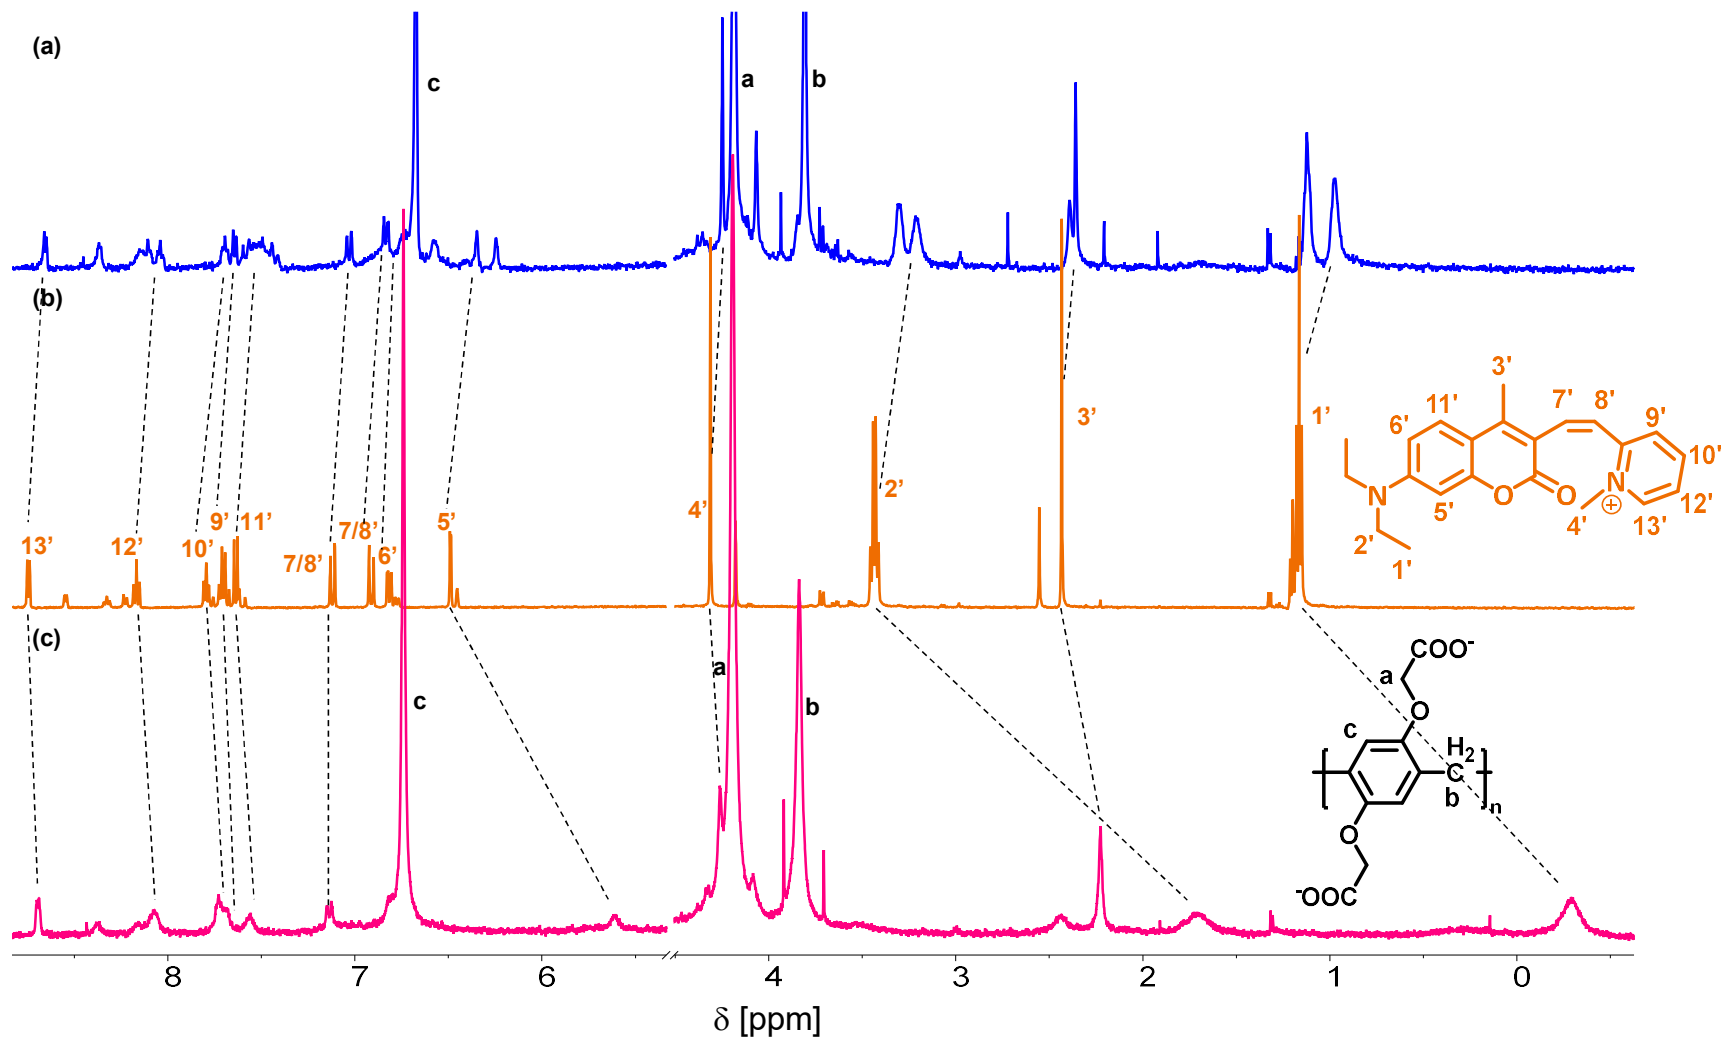

Fig. S4: (a) *trans*-CP + WP5 after 10 min irradiation with the green LED, (b) a *cis*-CP/*trans*-CP PSS mixture containing 75% *cis*-CP, (c) *trans*-CP + WP6 after 10 min irradiation with the green LED at 500 MHz,  $\text{D}_2\text{O}$ ;  $[\text{CP}] = 6 \times 10^{-4}$  M.

**S5. Determination of the stoichiometry of the *trans*-CP-WPn complexes**

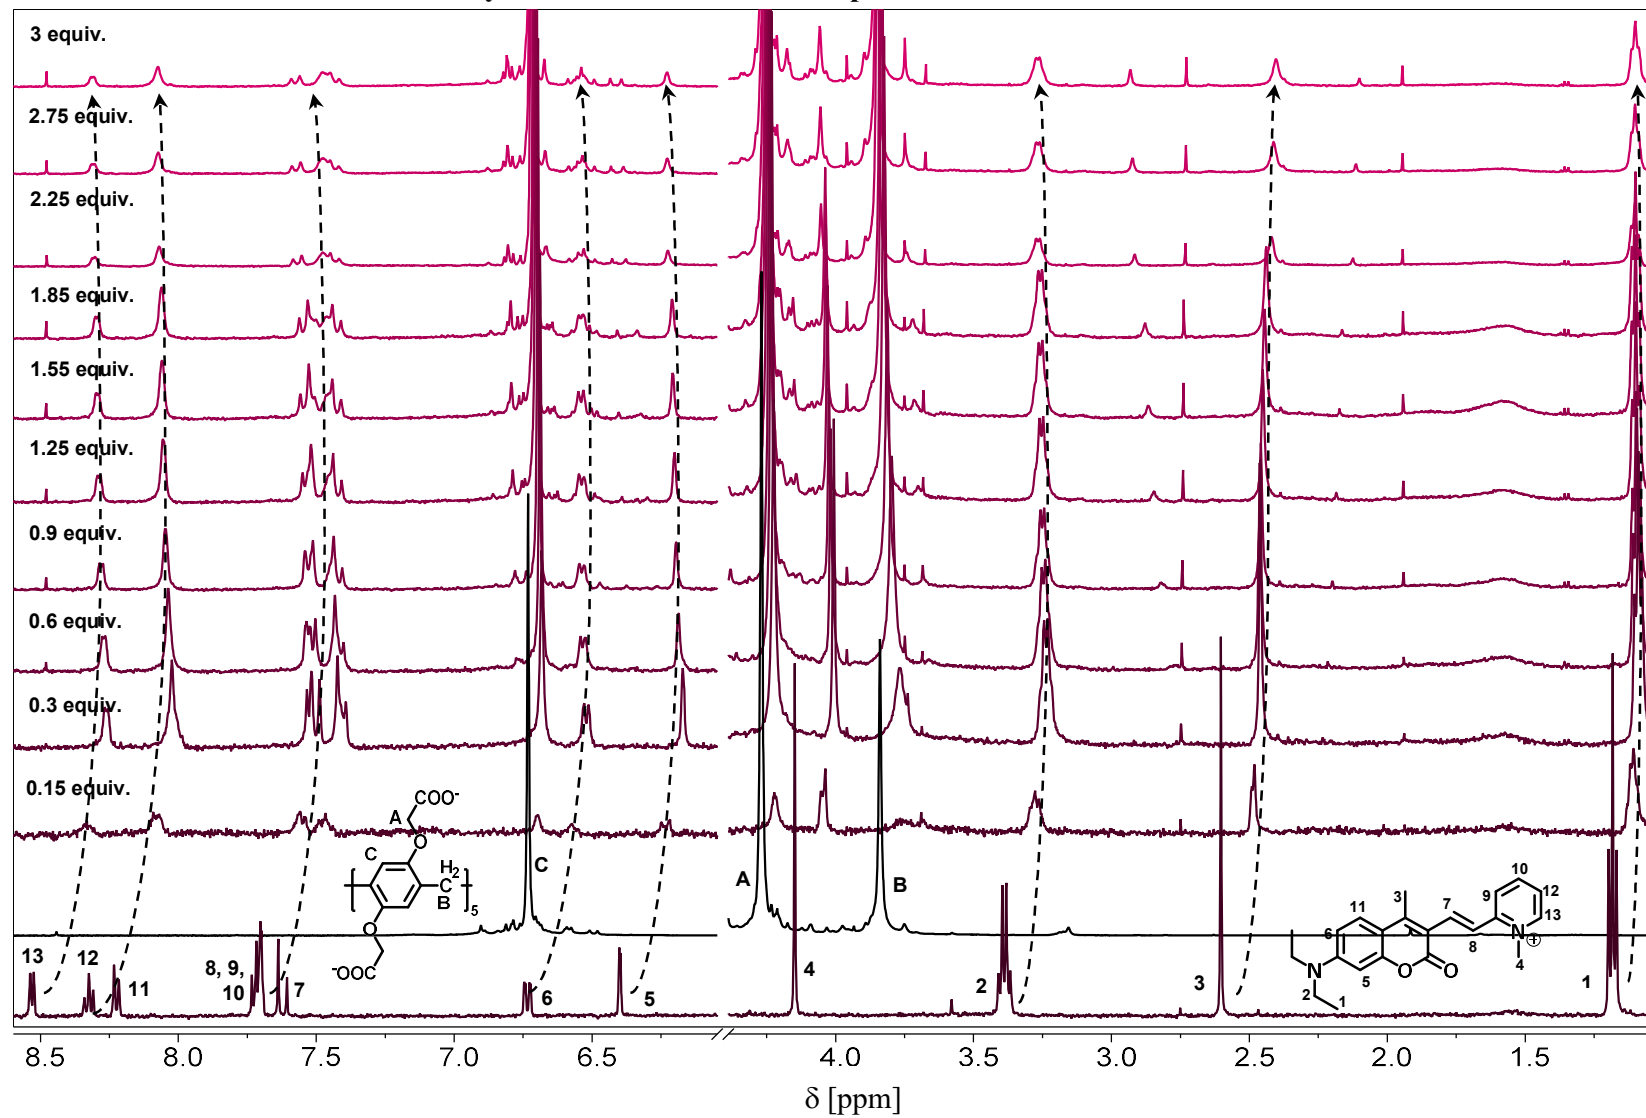

Fig. S5: <sup>1</sup>H-NMR titration of *trans*-CP in D<sub>2</sub>O containing 0 – 3 equiv. of WP5, [CP] = 8 × 10<sup>-4</sup> M

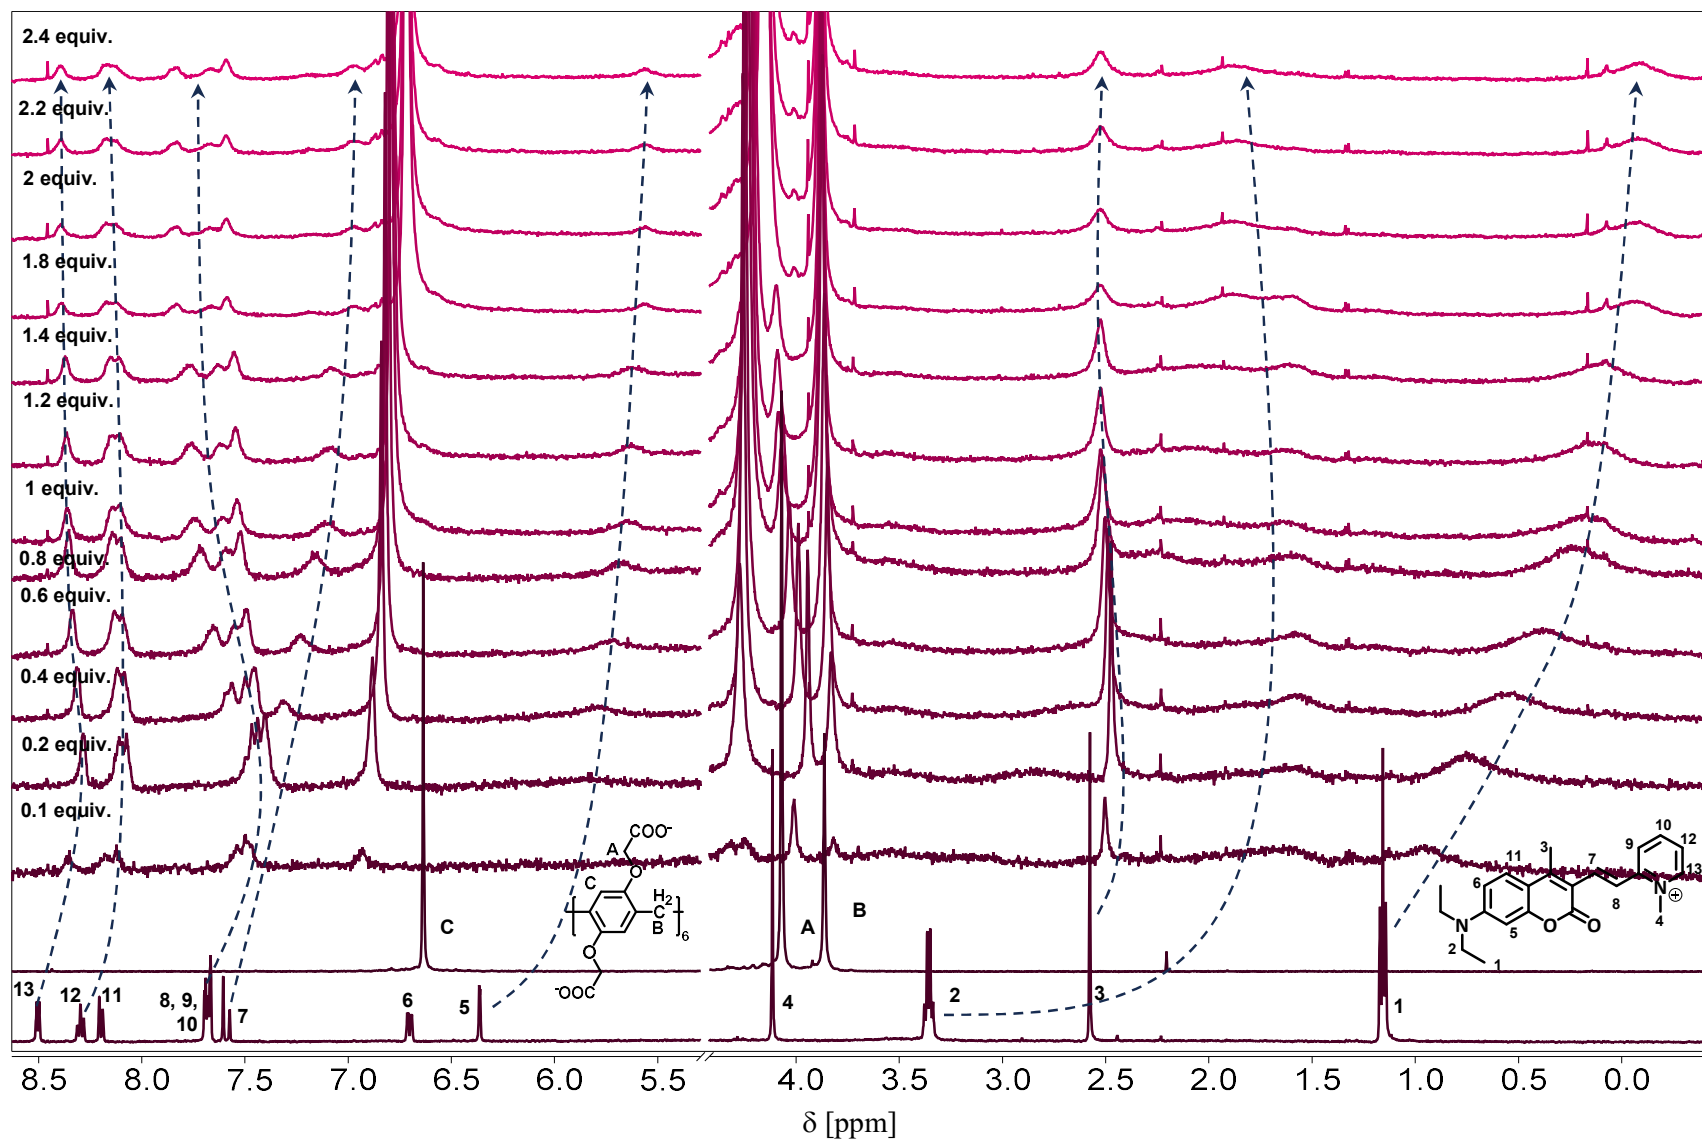

Fig. S6:  $^1\text{H-NMR}$  titration of *trans*-CP in  $\text{D}_2\text{O}$  containing 0 – 2.4 equiv. of WP6,  $[\text{CP}] = 7 \times 10^{-4} \text{ M}$

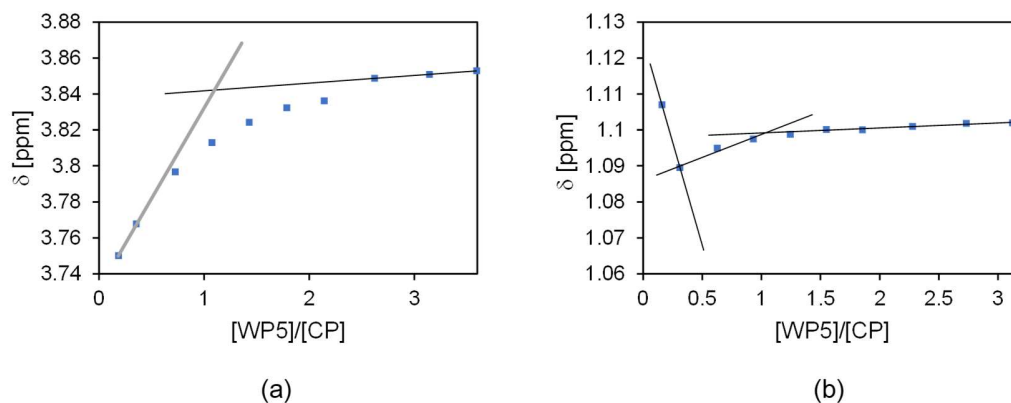

Fig. S7: Molar ratio plot for (a) **B** and (b) **1** protons in *trans*-CP·WP5-complex,  $[CP] = 8 \times 10^{-4} \text{ M}$

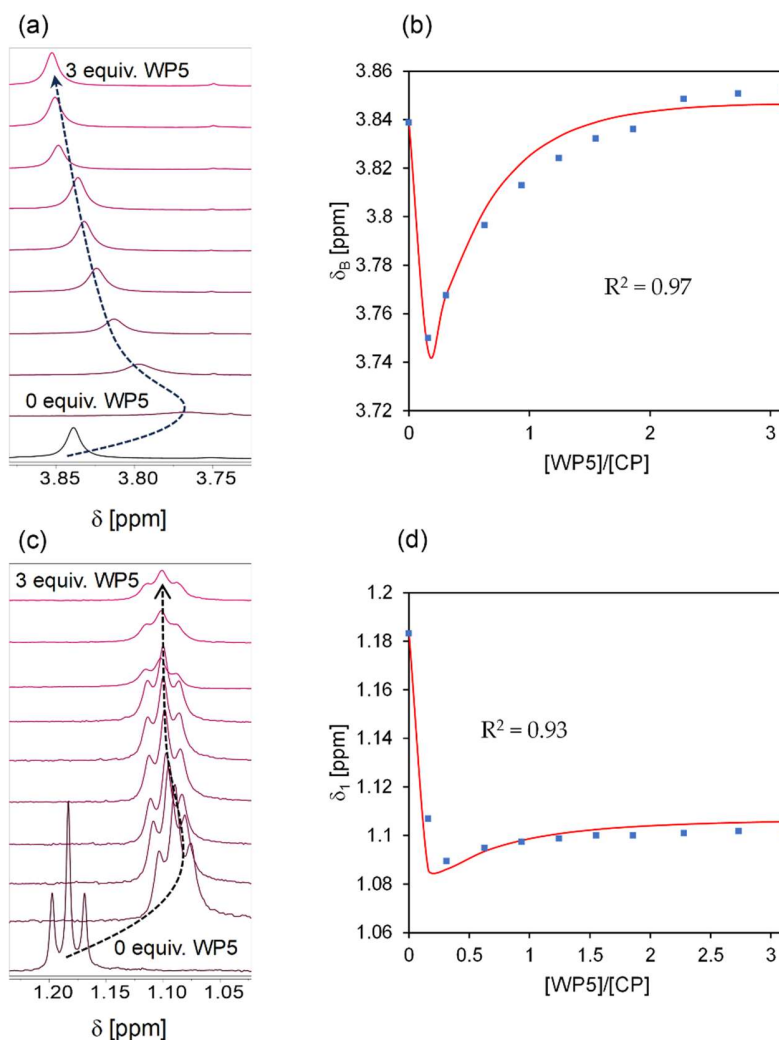

Fig. S8: Ranges of the  $^1\text{H}$  NMR spectra (500 MHz,  $\text{D}_2\text{O}$ ) presenting protons **B** and **1** in *trans*-CP and 0 – 3 equiv. WP5 mixtures (a and c); binding constant least-squares fitting for **B** (b) and **1** (d) protons in *trans*-CP complex



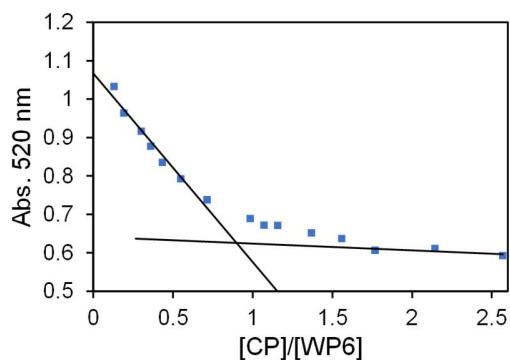

Fig. S9: Molar ratio plot for the *trans*-CP·WP6 complex,  $[CP] = 4 \times 10^{-5}$  M

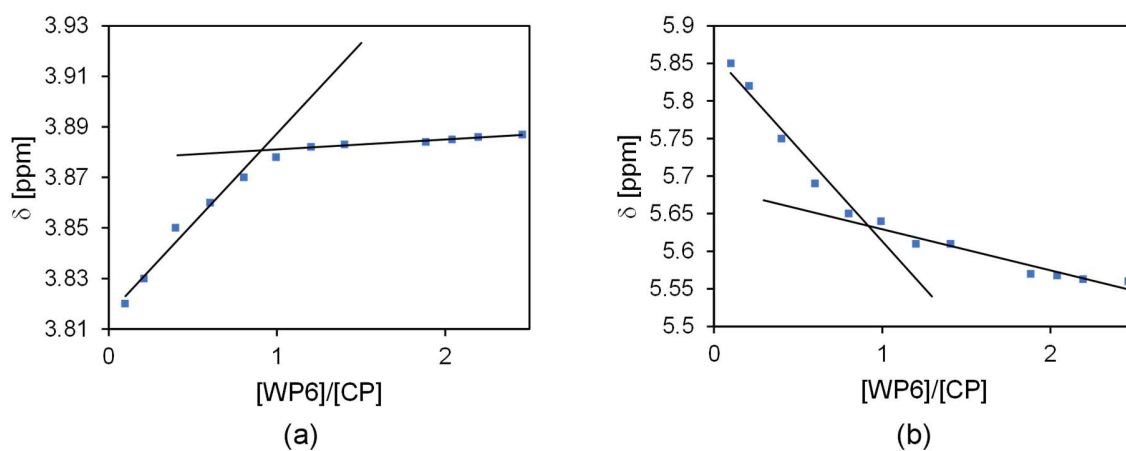

Fig. S10: Molar ratio plot for (a) **B** and (b) **5** protons in the *trans*-CP·WP6 complex,  $[CP] = 7 \times 10^{-4}$  M

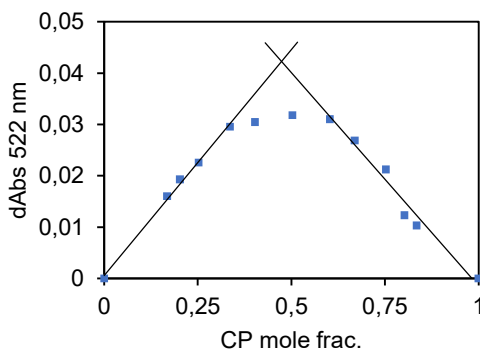

Fig. S11: Job's plot for determination of the stoichiometry of the *trans*-CP·WP6 complex; the sum of the concentrations of *trans*-CP and WP6 is  $2 \cdot 10^{-5}$  M;

## S6. Theoretical calculations

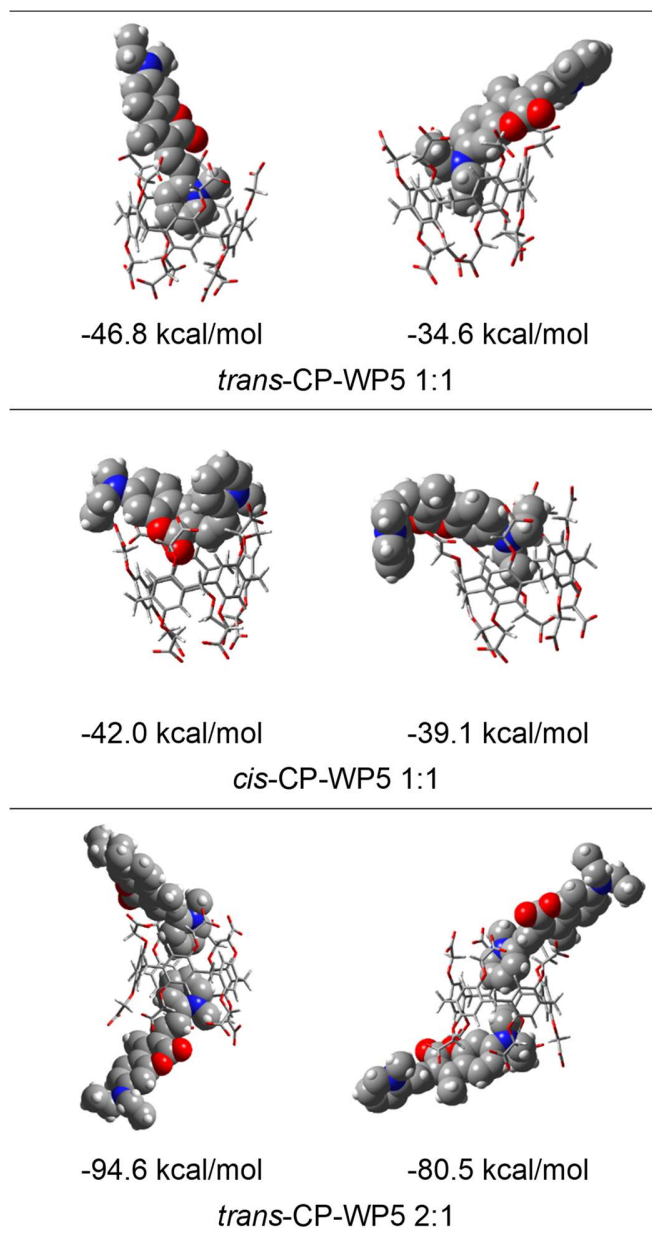

Fig. S12. Theoretically calculated structures and binding energies of CP-WP5 1:1 and 2:1 complexes
